# Supplementary material for: Deep Targeted Sequencing and Its Potential Implication for Cancer Therapy in Chinese Patients with Gastric Adenocarcinoma
Source: PubMed Central journal article supplement — Oncologist. 2021 Feb 8;26(5):e756–68. doi: 10.1002/onco.13695 (PMC8100567; doi:10.1002/onco.13695), 2021-02-08
Supplement: ONCO-26-e756-s001.pdf [file ONCO-26-e756-s001.pdf]

Supplemental Tables for:

Deep targeted sequencing and its potential implication for cancer therapy in Chinese patients with gastric adenocarcinoma

Xiangdong Cheng et al.

**Table S1. Characteristics of the patients**

| Characteristics   | Number | Percentage |
|-------------------|--------|------------|
| <b>Age</b>        |        |            |
| 20-30 years       | 11     | 2.10%      |
| 31-40 years       | 22     | 4.20%      |
| 41-50 years       | 79     | 14.90%     |
| 51-60 years       | 159    | 30.10%     |
| 61-70 years       | 178    | 33.60%     |
| 71-80 years       | 72     | 13.60%     |
| 81-90 years       | 8      | 1.50%      |
| <b>Gender</b>     |        |            |
| Male              | 356    | 67.30%     |
| Female            | 173    | 32.70%     |
| <b>Stage</b>      |        |            |
| I-II              | 111    | 21.00%     |
| III-IV            | 341    | 64.50%     |
| Unknown           | 77     | 14.50%     |
| <b>MSI status</b> |        |            |
| MSS/MSI-L         | 469    | 88.70%     |
| MSI-H             | 60     | 11.30%     |
| <b>TMB status</b> |        |            |
| <10 Muts/Mb       | 363    | 68.60%     |
| ≥10 Muts/Mb       | 166    | 31.40%     |
| 10-20 Muts/Mb     | 96     | 18.10%     |
| 20-50 Muts/Mb     | 33     | 6.20%      |
| 50-100 Muts/Mb    | 31     | 5.90%      |
| ≥100 Muts/Mb      | 6      | 1.10%      |

Supplemental Tables for:

Deep targeted sequencing and its potential implication for cancer therapy in Chinese patients with gastric adenocarcinoma

Xiangdong Cheng et al.

**Table S2.** Gene lists for OM 450-gene panel.

**Gene name**

|         |        |         |         |
|---------|--------|---------|---------|
| ABL1    | BCORL1 | CFTR    | EPHA2   |
| ABL2    | BCR    | CHD2    | EPHA3   |
| ACVR1B  | BIRC5  | CHD4    | EPHA5   |
| ACVR2A  | BLK    | CHEK1   | EPHA7   |
| ADAM29  | BLM    | CHEK2   | EPHB1   |
| ADGRA2  | BMPR1A | CIC     | ERBB2   |
| AKT1    | BMX    | COL1A1  | ERBB3   |
| AKT2    | BRAF   | CRBN    | ERBB4   |
| AKT3    | BRCA1  | CREB3L1 | ERCC1   |
| ALK     | BRCA2  | CREB3L2 | ERG     |
| AMER1   | BRD4   | CREBBP  | ERRFI1  |
| APC     | BRIP1  | CRKL    | ESR1    |
| APEX1   | BTG1   | CRLF2   | ETV1    |
| AR      | BTK    | CSF1    | ETV4    |
| ARAF    | CAMTA1 | CSF1R   | ETV5    |
| ARFRP1  | CARD11 | CSK     | ETV6    |
| ARID1A  | CBFB   | CSNK1A1 | EWSR1   |
| ARID1B  | CBL    | CTCF    | EZH2    |
| ARID2   | CCND1  | CTNNA1  | FAM135B |
| ASXL1   | CCND2  | CTNNB1  | FAM46C  |
| ATF1    | CCND3  | CUL3    | FANCA   |
| ATM     | CCNE1  | CXCR4   | FANCC   |
| ATR     | CD274  | CYLD    | FANCD2  |
| ATRX    | CD79A  | CYP17A1 | FANCE   |
| AURKA   | CD79B  | CYP2D6  | FANCF   |
| AURKB   | CDC73  | DAXX    | FANCG   |
| AXIN1   | CDH1   | DDR1    | FANCL   |
| AXIN2   | CDK12  | DDR2    | FANCM   |
| AXL     | CDK4   | DICER1  | FAS     |
| BAP1    | CDK6   | DNMT3A  | FAT1    |
| BARD1   | CDK8   | DOT1L   | FAT3    |
| BCL2    | CDKN1A | DPYD    | FAT4    |
| BCL2L1  | CDKN1B | EGF     | FBXW7   |
| BCL2L11 | CDKN2A | EGFR    | FEN1    |
| BCL2L2  | CDKN2B | EMSY    | FEV     |
| BCL6    | CDKN2C | EP300   | FGF10   |
| BCOR    | CEBPA  | EPCAM   | FGF12   |

Supplemental Tables for:

Deep targeted sequencing and its potential implication for cancer therapy in Chinese patients with gastric adenocarcinoma

Xiangdong Cheng et al.

---

|        |          |         |          |
|--------|----------|---------|----------|
| FGF14  | GRIN2A   | KMT2C   | MYCL     |
| FGF19  | GRM3     | KMT2D   | MYCN     |
| FGF23  | GSK3B    | KRAS    | MYD88    |
| FGF3   | H3F3A    | LCK     | NBN      |
| FGF4   | HCK      | LIMK1   | NCOA2    |
| FGF6   | HDAC9    | LMO1    | NCOR1    |
| FGF7   | HGF      | LRP1    | NEK11    |
| FGFR1  | HNF1A    | LRP1B   | NF1      |
| FGFR2  | HRAS     | LRP2    | NF2      |
| FGFR3  | HSD3B1   | LYN     | NFE2L2   |
| FGFR4  | HSP90AA1 | LZTR1   | NFIB     |
| FGR    | HTATIP2  | MACC1   | NFKBIA   |
| FH     | IDH1     | MAGI2   | NKX2-1   |
| FLCN   | IDH2     | MAP2K1  | NOTCH1   |
| FLI1   | IGF1R    | MAP2K2  | NOTCH2   |
| FLT1   | IGF2     | MAP2K4  | NOTCH3   |
| FLT3   | IKBKE    | MAP3K1  | NOTCH4   |
| FLT4   | IKZF1    | MAP3K13 | NPM1     |
| FOS    | IL7R     | MAP4K5  | NR4A3    |
| FOXL2  | INHBA    | MCL1    | NRAS     |
| FOXO1  | INPP4B   | MDM2    | NRG1     |
| FOXP1  | IRF2     | MDM4    | NRG3     |
| FRS2   | IRF4     | MED12   | NSD1     |
| FUBP1  | IRS2     | MEF2B   | NTRK1    |
| FUS    | ITK      | MEN1    | NTRK2    |
| FYN    | JAK1     | MERTK   | NTRK3    |
| GABRA6 | JAK2     | MET     | NUP93    |
| GATA1  | JAK3     | MGMT    | PAK3     |
| GATA2  | JUN      | MITF    | PALB2    |
| GATA3  | KAT6A    | MLH1    | PARK2    |
| GATA4  | KDM5A    | MPL     | PARP1    |
| GATA6  | KDM5B    | MRE11   | PARP2    |
| GID4   | KDM5C    | MS4A1   | PARP3    |
| GLI1   | KDM6A    | MSH2    | PARP4    |
| GLI2   | KDR      | MSH6    | PAX5     |
| GLI3   | KEAP1    | MST1R   | PBRM1    |
| GNA11  | KEL      | MTOR    | PCA3     |
| GNA13  | KIT      | MUTYH   | PDCD1    |
| GNAQ   | KLHL6    | MYB     | PDCD1LG2 |
| GNAS   | KMT2A    | MYC     | PDGFB    |

Supplemental Tables for:

Deep targeted sequencing and its potential implication for cancer therapy in Chinese patients with gastric adenocarcinoma

Xiangdong Cheng et al.

---

|         |         |          |        |
|---------|---------|----------|--------|
| PDGFRA  | RAD54L  | SOX2     | TSC1   |
| PDGFRB  | RAF1    | SOX9     | TSC2   |
| PDK1    | RANBP2  | SPEN     | TSHR   |
| PIK3C2B | RARA    | SPINK1   | TYK2   |
| PIK3CA  | RB1     | SPOP     | U2AF1  |
| PIK3CB  | RBM10   | SPTA1    | UGT1A1 |
| PIK3CD  | RECQL   | SRC      | VEGFA  |
| PIK3CG  | REL     | SRMS     | VHL    |
| PIK3R1  | RELA    | SS18     | WEE1   |
| PIK3R2  | RELB    | SSX1     | WEE2   |
| PKD2    | RET     | STAG2    | NSD2   |
| PLA2G1B | RHBDF2  | STAT3    | WISP3  |
| PLCG2   | RHOA    | STAT4    | WT1    |
| PMS2    | RICTOR  | STK11    | XIAP   |
| POLB    | RNF43   | STK24    | XPO1   |
| POLD1   | ROCK1   | SUFU     | XRCC2  |
| POLE    | ROCK2   | SYK      | XRCC3  |
| PPP2R1A | ROS1    | TAF1     | YES1   |
| PRDM1   | RPTOR   | TBX3     | ZBTB2  |
| PREX2   | RUNX1   | TCF7L2   | ZNF217 |
| PRKACA  | RUNX1T1 | TEK      | ZNF703 |
| PRKAR1A | RXRA    | TERT     | ZNF750 |
| PRKCI   | SDHA    | TET1     |        |
| PRKDC   | SDHB    | TET2     |        |
| PRSS1   | SDHC    | TET3     |        |
| PRSS8   | SDHD    | TFE3     |        |
| PTCH1   | SETD2   | TGFBR1   |        |
| PTEN    | SF3B1   | TGFBR2   |        |
| PTK2    | SIK1    | TIE1     |        |
| PTK6    | SLIT2   | TIPARP   |        |
| PTPN11  | SMAD2   | TMPRSS2  |        |
| QKI     | SMAD3   | TNFAIP3  |        |
| RAC1    | SMAD4   | TNFRSF14 |        |
| RAD50   | SMARCA4 | TNFSF11  |        |
| RAD51   | SMARCB1 | TNFSF13B |        |
| RAD51B  | SMARCD1 | TNK2     |        |
| RAD51C  | SMO     | TOP1     |        |
| RAD51D  | SNCAIP  | TOP2A    |        |
| RAD52   | SOCS1   | TP53     |        |
| RAD54B  | SOX10   | TPMT     |        |
